# Supplementary material for: Multi-locus DNA metabarcoding of zooplankton communities and scat reveal trophic interactions of a generalist predator
Source: PubMed Central journal article supplement (PMC6342929; doi:10.1038/s41598-018-36478-x), 2019-01-22
Supplement: 41598_2018_36478_MOESM1_ESM.pdf [file 41598_2018_36478_MOESM1_ESM.pdf]

**Supplementary Material For:**

**Multi-locus DNA metabarcoding of zooplankton communities and scat reveal trophic interactions of a generalist predator**

**Running page head:** Metabarcoding of whale trophic interactions

E. L. Carroll<sup>1</sup>, R. Gallego<sup>1</sup>, M. A. Sewell<sup>1</sup>, J. Zeldis<sup>2</sup>, L. Ranjard<sup>3</sup>, H. A. Ross<sup>1</sup>, L. K. Tooman<sup>4</sup>, R. O'Rorke<sup>1</sup>, R. D. Newcomb<sup>1,4</sup>, and R. Constantine<sup>1,5\*</sup>

<sup>1</sup> School of Biological Sciences, University of Auckland, Auckland, New Zealand

<sup>2</sup> National Institute of Water and Atmospheric Research, Christchurch, New Zealand

<sup>3</sup> Research School of Biology, the Australian National University, ACT, Australia

<sup>4</sup> The Institute for Plant & Food Research, Auckland, New Zealand

<sup>5</sup> Institute of Marine Science, University of Auckland, Auckland, New Zealand

\* Corresponding author: [e.carroll@auckland.ac.nz](mailto:e.carroll@auckland.ac.nz)

## **Carroll et al. Supplementary Material 1**

### **Supplementary Material 1.1: DNA barcode library preparation**

We constructed DNA barcode libraries comprising 18S and COI gene fragments for the zooplankton community and whale scat samples. We amplified the 18S gene using primers EukB and 18s\_v9\_Con [1], modified to have the Illumina Nextera sequencing overhang adapters (Supplementary Table 1), and PCR conditions described previously [1]. To enrich for prey DNA in the whale scat and for consistency in the matched water control, we used a PNA-clamp (CGACCGTCTTCTCAGC-Lys) that binds downstream of PCR primers and arrests polymerisation [1].

We amplified a 300-400 bp fragment of the COI gene using primers jgHCO1298 and mlCOIintF [2] modified to have the Illumina Nextera sequencing primer overhang adapters (Supplementary Table 1). The PCR was conducted in a 25  $\mu$ L reaction containing 1xKAPA 2G buffer (KAPA Biosystems), 0.25  $\mu$ M primers, 0.2mM dNTPs, 1mM Mg, and 1 unit of KAPA 2G taq polymerase (KAPA Biosystems). The PCR reaction had an initial denaturation period of two minutes at 95°C, followed by 35 cycles of 95°C for 20s, 48°C for 30s and 72°C for 60s, and a final extension period of three minutes at 72°C. To inhibit the amplification of predator DNA in the whale scat and for consistency in the matched water controls, we added a blocking primer (5'-ATCCCCCTTTAGCCGAAATCTAG-3's). This was designed by aligning potential prey [sourced from 2] and whale COI gene sequences sourced from genbank together in geneious (Biomatters, available from <http://www.geneious.com>). The final concentration of blocking primer of 1.25  $\mu$ M was found through PCR trials of known quantities of predator and prey DNA (data not shown).

## Supplementary Material - Metabarcoding of whale trophic interactions

Given the degraded DNA template present in the whale scat samples, we undertook several precautions. As previously mentioned, DNA was extracted in a laminar flow UV hood to minimise contamination. All PCR mixtures were prepared in a UV laminar flow hood in a separate room. DNA template was added to the PCR mixture in a separate UV flow hood. Multiple negative controls were used per PCR and results were only used from PCRs where there were no visible bands in the negative controls. Furthermore, sample types were extracted and amplified, and amplicons cleaned, in separate experiments, to limit the chance of cross-contamination.

### Selecting clustering threshold

To select the clustering threshold for use in the analyses, we assessed the change in measures of biodiversity with different clustering levels, by calculating the  $\alpha$ ,  $\beta$  and  $\gamma$  diversity indices (effective and Shannon) of Jost [3,4] using the R package *vegetarian* (Charney and Record 2012) for each DNA barcode. Several series of OTUs were created by clustering at iterative levels of sequence similarity, incrementing by 1% between 90% and 100% [6]. This revealed that clustering at 98-100% similarity resulted in high levels of diversity across all three DNA barcodes (Supplementary Fig. 1). The diversity indices started to plateau when clustering was at 97%. This threshold was used for further analyses.

Table S1: Amplicon library primers.

| Gene | Primer         | Sequence                                                                       | Reference           |
|------|----------------|--------------------------------------------------------------------------------|---------------------|
| 18S  | NexF-V9F       | <u>TCGTCGGCAGCGTCAGATGTGTATAAGAGACAG</u><br>TGATCCTTCTGCAGGTTACCTAC            | O'Rourke et al. [1] |
|      | NexR-V9R       | <u>GTCTCGTGGGCTCGGAGATGTGTATAAGAGACA</u><br><u>G</u><br>CCCTTTGTACACACCGCCC    |                     |
| COI  | NexF-mlCOIintF | <u>TCGTCGGCAGCGTCAGATGTGTATAAGAGACAG</u><br>GGWACWGGWTGAACWGTWTAYCCYCC         | Leray et al. [2]    |
|      | NexR-jgHCO2198 | <u>GTCTCGTGGGCTCGGAGATGTGTATAAGAGACA</u><br><u>G</u> TAIACYTCIGGRTGICCRARAAYCA |                     |

## Supplementary Material - Metabarcoding of whale trophic interactions

Table S2: List of Phyla and their common name that were removed from the analyses due to several factors, including likely being environmental or laboratory contamination (e.g. birds, likely environmental contamination), or because they are not zooplankton taxa (e.g algae).

| Category             | Phylum                             | Common Name              |
|----------------------|------------------------------------|--------------------------|
| Contaminants         | Mammalia                           | mammals                  |
|                      | Aves                               | birds                    |
|                      | Fungi                              | fungi                    |
| Not zooplankton taxa | Heterokonta                        | algae                    |
|                      | Haptophyte                         | algae                    |
|                      | Rhodophyta                         | algae                    |
|                      | Viridiplantae                      | algae                    |
|                      | Telonemida                         | algae                    |
|                      | Cryptophyta                        | algae                    |
|                      | Bacteria                           | bacteria                 |
|                      | Arthropoda:Insecta                 | insects                  |
|                      | Arthropoda:Chiliopoda              | millipedes               |
|                      | Plasmodium                         | Single-celled eukaryotes |
|                      | Myxozoa                            | Single-celled eukaryotes |
|                      | Centroheliozoa                     | Single-celled eukaryotes |
|                      | Choanoflagellida                   | Single-celled eukaryotes |
|                      | Euglenozoa                         | Single-celled eukaryotes |
|                      | Ciliophora                         | Single-celled eukaryotes |
| Rhizaria             | Primarily single-celled eukaryotes |                          |

## Supplementary Material - Metabarcoding of whale trophic interactions

Table S3: The number of reads, Shannon (Sh- $\alpha$ )  $\alpha$  diversity calculated per zooplankton sample. Diversity statistics were calculated by subsampling to the lowest number of reads per sample per DNA barcode was 962 for COI and 1956 for 18S. Regions correspond to Outer Hauraki Gulf (Outer), Inner Hauraki Gulf (Inner) and Firth of Thames (Firth). Some samples had low number of reads and were therefore excluded from the diversity statistics calculation for 16S and COI.

| Sample | Region | Season | COI   |              | 18S   |              |
|--------|--------|--------|-------|--------------|-------|--------------|
|        |        |        | reads | Sh- $\alpha$ | reads | Sh- $\alpha$ |
| C34    | Outer  | Cool   | 6315  | 52           | 2363  | 2            |
| C35    | Outer  | Warm   | 4019  | 45           | 13765 | 2            |
| C36    | Outer  | Cool   | 4720  | 83           | 7407  | 1            |
| C37    | Inner  | Cool   | 2072  | 64           | 3051  | 3            |
| CS8    | Inner  | Warm   | 2695  | 20           | 2223  | 6            |
| C39    | Inner  | Cool   | 961   | 42           | 2199  | 2            |
| C40    | Firth  | Cool   | 6467  | 17           | 5509  | 2            |
| C41    | Inner  | Cool   | 7028  | 19           | 1956  | 3            |
| C42    | Outer  | Cool   | 2556  | 30           | 2880  | 5            |
| C43    | Inner  | Warm   | 7993  | 10           | 4580  | 2            |
| C44    | Inner  | Cool   | 3474  | 15           | 3845  | 5            |
| C45    | Inner  | Warm   | 6383  | 17           | 3263  | 2            |
| C46    | Inner  | Warm   | 6064  | 25           | 3476  | 4            |
| C47    | Outer  | Warm   | 3967  | 34           | 2287  | 3            |
| C48    | Outer  | Cool   | 4723  | 39           | 3973  | 2            |
| C49    | Outer  | Warm   | 414   | -            | 5427  | 4            |
| C50    | Outer  | Cool   | 7347  | 12           | 4044  | 2            |
| C51    | Outer  | Warm   | 5579  | 53           | 5869  | 1            |
| C52    | Firth  | Cool   | 10852 | 10           | 4513  | 3            |
| C53    | Inner  | Cool   | 15235 | 11           | 5842  | 2            |
| C54    | Outer  | Cool   | 6566  | 51           | 4209  | 3            |
| C55    | Firth  | Warm   | 14111 | 25           | 4142  | 6            |
| C56    | Inner  | Warm   | 3756  | 11           | 9373  | 4            |
| C57    | Outer  | Warm   | 20124 | 14           | 6011  | 9            |

Supplementary Material - Metabarcoding of whale trophic interactions

Table S4: The number of reads, Shannon (Sh- $\alpha$ ) and Simpson's (Si- $\alpha$ )  $\alpha$  diversity calculated per sample for whale scat. Diversity statistics were calculated by subsampling to the lowest number of reads per sample per DNA barcode: 1956 reads for 18S, 952 reads for COI. Regions correspond to Outer Hauraki Gulf (Outer) and Inner Hauraki Gulf (Inner). Not all samples had sampling location information (marked by N/A).

| Scat sample | Region | Season | 18S reads | Sh- $\alpha$ | COI reads | Sh- $\alpha$ |
|-------------|--------|--------|-----------|--------------|-----------|--------------|
| S01         | Inner  | Cool   | -         | -            | -         | -            |
| S02         | N/A    | Cool   | 137094    | 4            | 675       | -            |
| S03         | Inner  | Cool   | 109592    | 6            | 5983      | 22           |
| S04         | Inner  | Warm   | 39640     | 5            | 11796     | 12           |
| S05         | Outer  | Warm   | 15258     | 3            | 18207     | 34           |
| S06         | Inner  | Cool   | 11477     | 8            | 2075      | 37           |
| S07         | Inner  | Cool   | 76565     | 3            | 14836     | 81           |
| S08         | Inner  | Cool   | 92697     | 6            | 15136     | 29           |
| S09         | Inner  | Cool   | 64078     | 4            | 4495      | 66           |
| S10         | Outer  | Cool   | -         | -            | 8630      | 39           |
| S11         | Outer  | Cool   | -         | -            | 4099      | 9            |
| S12         | Outer  | Cool   | -         | -            | 26070     | 34           |
| S13         | Outer  | Warm   | -         | -            | 73508     | 29           |
| S14         | Outer  | Cool   | 7127      | 5            | 7763      | 52           |
| S15         | Outer  | Cool   | 21132     | 5            | 17563     | 46           |
| S16         | Inner  | Cool   | 227       | -            | 6235      | 14           |
| S17         | N/A    | Warm   | 6022      | 3            | 13606     | 25           |
| S18         | Inner  | Warm   | 46235     | 2            | -         | -            |
| S19         | Inner  | Warm   | 21677     | 11           | -         | -            |
| S20         | Inner  | Cool   | 513       | -            | -         | -            |

Table S5: P - value for each factor in multi-factorial PERMANOVA analyses used to investigate the difference in whale scat and zooplankton community composition due to sampling region and temperature season, and sample type (Type). Matrix indicates what distance matrix the PERMANOVA was based on and include: Jaccard similarity measure on presence-absence transformed data (Jaccard) or a Bray-Curtis similarity matrix on fourth root transformed data (Bray-Curtis), weighted (Unifrac - W) and unweighted UniFrac (Unifrac - U) distances. The CAP results for those comparisons that were significant for type can be found in Supplementary Material 2.

| DNA barcode | Matrix      | Scat samples | Plankton samples | Region | Season | Type   |
|-------------|-------------|--------------|------------------|--------|--------|--------|
| COI         | Jaccard     | 14           | 23               | 0.002  | <0.001 | 0.001  |
| COI         | Bray-Curtis | 14           | 23               | 0.002  | <0.001 | <0.001 |
| COI         | Unifrac-U   | 14           | 23               | 0.002  | <0.001 | <0.001 |
| COI         | Unifrac-W   | 14           | 23               | 0.350  | 0.057  | 0.216  |
| 18S         | Jaccard     | 11           | 24               | 0.009  | 0.042  | <0.001 |
| 18S         | Bray-Curtis | 11           | 24               | 0.006  | 0.016  | <0.001 |
| 18S         | Unifrac-U   | 11           | 24               | 0.008  | 0.046  | 0.001  |
| 18S         | Unifrac-W   | 11           | 24               | 0.007  | <0.001 | 0.201  |

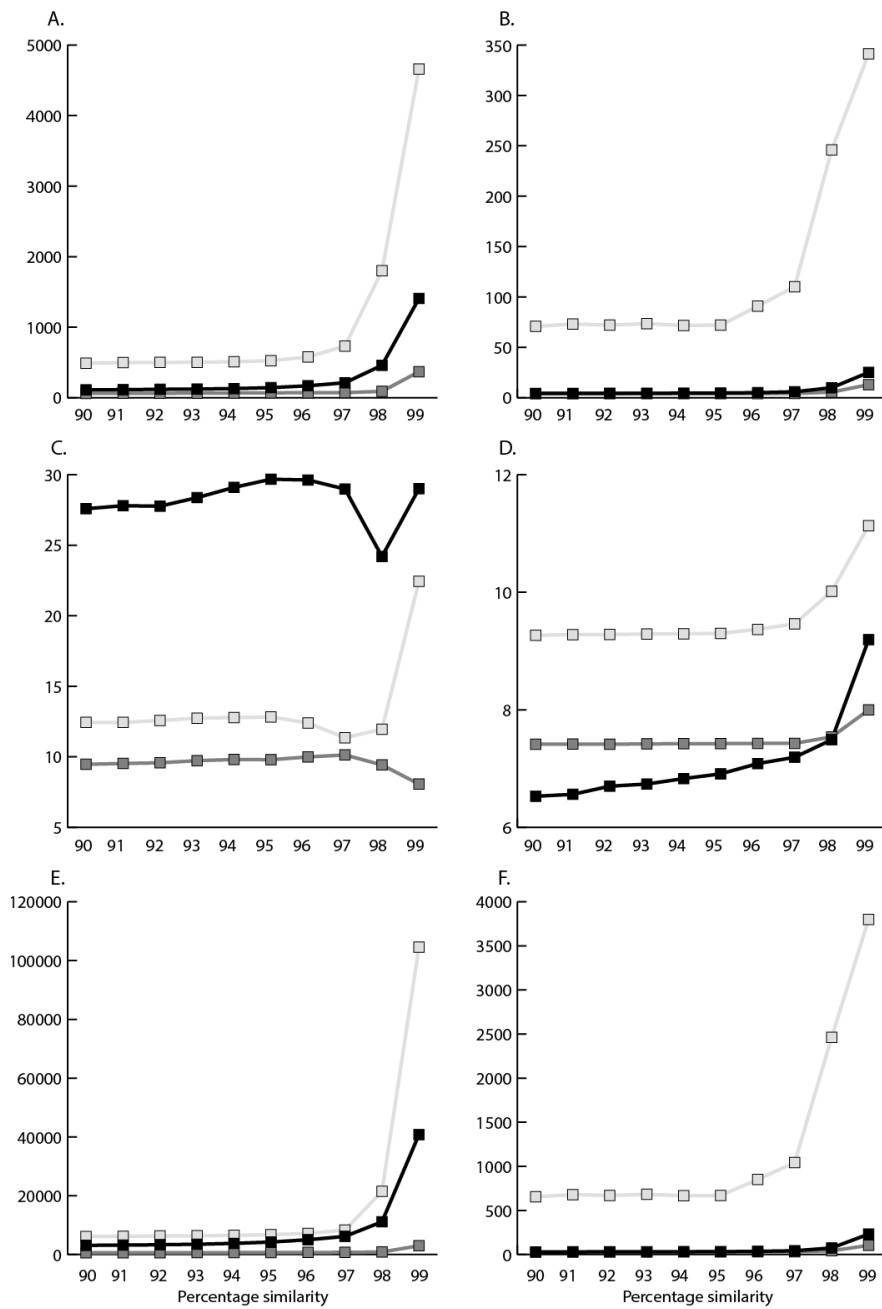

Figure S1: Change in the biodiversity statistics of each DNA barcode of Jost (2006, 2007) with change in clustering (90 – 99%) for the zooplankton community samples. Shown are effective  $\alpha$  (Panel A),  $\beta$  (C),  $\gamma$  (E) and Shannon  $\alpha$  (B),  $\beta$  (D),  $\gamma$  (F) diversity statistics.



## Supplementary Material 1.2: Availability of data and reconstructing principal coordinate analyses (PCO) and canonical analyses of principal components

### (CAP)

Both unconstrained PCO and constrained CAP analyses were conducted on the zooplankton data for both DNA barcodes, using four different transformations reflecting OTU composition and relative read abundance, using OTU identity (Jaccard and Bray Curtis distances) and genetic similarity (UniFrac distances). PCO analyses are an unconstrained ordination that was conducted to visualise the data and show any emergent patterns. CAP analyses are constrained ordination that are conducted to test specific hypotheses [7].

Instead of putting all the visualisations into the Supplementary Material, we provide the data and R code for reconstructing both the transformations, PCO and CAP analyses on github:

[*github link to be added upon acceptance*]

This is also done for the whale scat for the PCO analyses:

[*github link to be added upon acceptance*]

### Supp Mat References

1. O'Rourke R, Lavery S, Chow N, Takeyama H, Tsai P, Beckley LE, et al. Determining the diet of larvae of western rock lobster (*Panulirus cygnus*) using high-throughput DNA sequencing techniques. PLoS One. 2012;7: e42757. doi:10.1371/journal.pone.0042757
2. Leray M, Yang JY, Meyer CP, Mills SC, Agudelo N, Ranwez V, et al. A new versatile primer set targeting a short fragment of the mitochondrial COI region for metabarcoding metazoan diversity: application for characterizing coral reef fish gut contents. Front Zool. Frontiers in Zoology; 2013;10: 34–48. doi:10.1186/1742-9994-10-34
3. Jost L. Entropy and diversity. Oikos. 2006;113: 363–375.
4. Jost L. Partitioning diversity into independent alpha and beta components. Ecology. 2007;88: 2427–2439. doi:10.1073/pnas.0807060105
5. Charney N, Record S. vegetarian: Jost diversity measures for community data. In: Accessed from <https://cran.r-project.org/web/packages/vegetarian/>. 2012.
6. Drummond AJ, Newcomb RD, Buckley TR, Xie D, Dopheide A, Potter BC, et al. Evaluating a multigene environmental DNA approach for biodiversity assessment. GigaScience; 2015;4: 46. doi:10.1186/s13742-015-0086-1
7. Anderson MJ, Willis TJ. Canonical analysis of principal coordinates: A useful method of constrained ordination for ecology. Ecology. 2003;84: 511–525.

Supplementary Material 2: Faith's phylogenetic distance measure analysis and CAP analyses results.

Faith's phylogenetic distance measure for 18S DNA barcode for zooplankton community samples

| Sample | ntaxa | pd.obs | pd.rand.me | pd.rand.s | pd.obs.ra | pd.obs.z | pd.obs.p |
|--------|-------|--------|------------|-----------|-----------|----------|----------|
| C34    | 15    | 2.46   | 2.58       | 0.80      | 582       | -0.14    | 0.58     |
| C35    | 20    | 3.92   | 3.22       | 0.93      | 842       | 0.76     | 0.84     |
| C36    | 11    | 1.92   | 2.03       | 0.67      | 532       | -0.16    | 0.53     |
| C37    | 21    | 3.47   | 3.38       | 0.94      | 715       | 0.10     | 0.72     |
| C38    | 37    | 5.30   | 5.06       | 1.13      | 703       | 0.21     | 0.70     |
| C39    | 18    | 3.40   | 2.99       | 0.87      | 826       | 0.47     | 0.83     |
| C40    | 15    | 2.72   | 2.60       | 0.80      | 741       | 0.15     | 0.74     |
| C41    | 16    | 3.62   | 2.77       | 0.87      | 875       | 0.98     | 0.88     |
| C42    | 38    | 4.79   | 5.18       | 1.13      | 497       | -0.34    | 0.50     |
| C43    | 20    | 3.85   | 3.22       | 0.92      | 846       | 0.69     | 0.85     |
| C44    | 19    | 3.82   | 3.15       | 0.91      | 838       | 0.74     | 0.84     |
| C45    | 22    | 4.05   | 3.48       | 0.97      | 821       | 0.60     | 0.82     |
| C46    | 26    | 4.30   | 3.93       | 1.00      | 792       | 0.37     | 0.79     |
| C47    | 16    | 2.71   | 2.73       | 0.80      | 637       | -0.02    | 0.64     |
| C48    | 18    | 2.77   | 2.97       | 0.86      | 527       | -0.23    | 0.53     |
| C49    | 42    | 4.40   | 5.50       | 1.13      | 119       | -0.98    | 0.12     |
| C50    | 26    | 3.69   | 3.94       | 1.01      | 547       | -0.25    | 0.55     |
| C51    | 15    | 2.73   | 2.61       | 0.80      | 741       | 0.15     | 0.74     |
| C52    | 35    | 5.59   | 4.86       | 1.10      | 759       | 0.66     | 0.76     |
| C53    | 21    | 3.65   | 3.35       | 0.92      | 793       | 0.32     | 0.79     |
| C54    | 26    | 3.30   | 3.94       | 1.02      | 281       | -0.62    | 0.28     |
| C55    | 25    | 4.35   | 3.83       | 0.99      | 786       | 0.53     | 0.79     |
| C56    | 22    | 4.10   | 3.45       | 0.93      | 838       | 0.70     | 0.84     |
| C57    | 41    | 5.48   | 5.40       | 1.13      | 682       | 0.07     | 0.68     |

Faith's phylogenetic distance measure for 18S DNA barcode for whale scat samples

| Sample | ntaxa | pd.obs | pd.rand.mean | pd.rand.sd | pd.obs.rank | pd.obs.z | pd.obs.p |
|--------|-------|--------|--------------|------------|-------------|----------|----------|
| P14    | 37    | 5.35   | 5.03         | 1.10       | 733         | 0.29     | 0.73     |
| P15    | 48    | 4.56   | 6.06         | 1.18       | 21          | -1.27    | 0.02     |
| P17    | 20    | 5.01   | 3.25         | 0.94       | 897         | 1.87     | 0.90     |
| P18    | 8     | 2.75   | 1.60         | 0.61       | 947         | 1.89     | 0.95     |
| P19    | 36    | 2.86   | 4.93         | 1.06       | 1           | -1.96    | 0.00     |
| P02    | 31    | 4.13   | 4.41         | 1.05       | 546         | -0.27    | 0.55     |
| P03    | 26    | 3.48   | 3.89         | 0.97       | 400         | -0.43    | 0.40     |
| P04    | 37    | 5.25   | 5.02         | 1.07       | 724         | 0.21     | 0.72     |
| P05    | 38    | 4.33   | 5.12         | 1.09       | 244         | -0.73    | 0.24     |
| P06    | 45    | 5.47   | 5.83         | 1.17       | 533         | -0.31    | 0.53     |
| P07    | 32    | 2.89   | 4.52         | 1.05       | 4           | -1.55    | 0.00     |
| P08    | 46    | 5.26   | 5.88         | 1.17       | 411         | -0.53    | 0.41     |
| P09    | 20    | 2.62   | 3.20         | 0.87       | 225         | -0.66    | 0.23     |

Faith's phylogenetic distance measure for COI DNA barcode for zooplankton community samples

| Sample | ntaxa | pd.obs | pd.rand.mean | pd.rand.sd | pd.obs.rank | pd.obs.z | pd.obs.p |
|--------|-------|--------|--------------|------------|-------------|----------|----------|
| P03    | 79    | 11.06  | 27.22        | 2.29       | 1           | -7.06    | 0.001    |
| P04    | 30    | 8.01   | 12.71        | 1.56       | 2           | -3.02    | 0.002    |
| P05    | 67    | 4.12   | 23.89        | 2.17       | 1           | -9.10    | 0.001    |
| P06    | 87    | 9.04   | 29.35        | 2.38       | 1           | -8.55    | 0.001    |
| P07    | 160   | 10.25  | 47.36        | 2.86       | 1           | -12.99   | 0.001    |
| P08    | 87    | 7.35   | 29.29        | 2.42       | 1           | -9.08    | 0.001    |
| P09    | 153   | 26.44  | 45.48        | 2.88       | 1           | -6.61    | 0.001    |
| P10    | 89    | 15.13  | 29.88        | 2.47       | 1           | -5.97    | 0.001    |
| P11    | 71    | 8.60   | 25.07        | 2.24       | 1           | -7.34    | 0.001    |
| P12    | 110   | 10.18  | 35.26        | 2.61       | 1           | -9.62    | 0.001    |
| P13    | 83    | 7.27   | 28.37        | 2.43       | 1           | -8.67    | 0.001    |
| P14    | 105   | 21.23  | 34.09        | 2.63       | 1           | -4.89    | 0.001    |
| P15    | 98    | 9.32   | 32.10        | 2.60       | 1           | -8.77    | 0.001    |
| P16    | 40    | 21.07  | 15.97        | 1.81       | 997         | 2.82     | 0.997    |

Faith's phylogenetic distance measure for COI DNA barcode for whale scat samples

| Zooplankton | ntaxa | pd.obs | pd.rand.me | pd.rand.sd | pd.obs.rank | pd.obs.z | pd.obs.p |
|-------------|-------|--------|------------|------------|-------------|----------|----------|
| C34         | 122   | 12.56  | 38.19      | 2.82       | 1           | -9.09    | 0.001    |
| C35         | 91    | 10.04  | 30.37      | 2.47       | 1           | -8.22    | 0.001    |
| C36         | 167   | 13.16  | 48.95      | 3.23       | 1           | -11.08   | 0.001    |
| C37         | 145   | 15.61  | 44.03      | 2.82       | 1           | -10.10   | 0.001    |
| C38         | 66    | 8.26   | 23.66      | 2.17       | 1           | -7.10    | 0.001    |
| C39         | 110   | 8.04   | 35.33      | 2.72       | 1           | -10.03   | 0.001    |
| C40         | 48    | 6.28   | 18.41      | 1.97       | 1           | -6.15    | 0.001    |
| C41         | 77    | 8.72   | 26.66      | 2.30       | 1           | -7.79    | 0.001    |
| C42         | 105   | 13.16  | 34.04      | 2.59       | 1           | -8.05    | 0.001    |
| C43         | 34    | 2.47   | 14.01      | 1.63       | 1           | -7.08    | 0.001    |
| C44         | 59    | 4.66   | 21.67      | 2.15       | 1           | -7.93    | 0.001    |
| C45         | 67    | 9.11   | 23.89      | 2.26       | 1           | -6.55    | 0.001    |
| C46         | 68    | 7.35   | 24.16      | 2.15       | 1           | -7.82    | 0.001    |
| C47         | 75    | 7.79   | 26.12      | 2.31       | 1           | -7.92    | 0.001    |
| C48         | 100   | 11.07  | 32.72      | 2.64       | 1           | -8.19    | 0.001    |
| C50         | 55    | 9.44   | 20.55      | 2.05       | 1           | -5.43    | 0.001    |
| C51         | 124   | 8.96   | 38.82      | 2.73       | 1           | -10.93   | 0.001    |
| C52         | 65    | 8.79   | 23.26      | 2.15       | 1           | -6.74    | 0.001    |
| C53         | 74    | 7.93   | 25.89      | 2.31       | 1           | -7.77    | 0.001    |
| C54         | 134   | 8.03   | 41.30      | 2.89       | 1           | -11.51   | 0.001    |
| C55         | 58    | 3.31   | 21.29      | 2.01       | 1           | -8.95    | 0.001    |
| C56         | 40    | 2.87   | 15.94      | 1.71       | 1           | -7.64    | 0.001    |
| C57         | 49    | 5.26   | 18.70      | 1.88       | 1           | -7.14    | 0.001    |

CAP analysis results for 18S DNA barcode

| Sample | Type     | Region | Season | Temp | Jaccard - CAP1Type | Jaccard - CAP1Temp | Jaccard - CAP1R | Jaccard - CAP2R | Bray - CAP1Type | Bray - CAP1Temp |
|--------|----------|--------|--------|------|--------------------|--------------------|-----------------|-----------------|-----------------|-----------------|
| S14    | Pooh     | Outer  | Spring | Cool | -0.76              | 0.78               | 0.26            | 0.17            | -0.60           | 1.02            |
| S15    | Pooh     | Outer  | Spring | Cool | -1.84              | 0.56               | -0.31           | 0.37            | -1.88           | 0.66            |
| S18    | Pooh     | Inner  | Summer | Warm | -0.27              | 0.87               | -0.39           | 0.25            | 0.10            | 1.35            |
| S19    | Pooh     | Inner  | Summer | Warm | -1.89              | 1.18               | -0.26           | 1.36            | -1.92           | 1.10            |
| S03    | Pooh     | Inner  | Winter | Cool | -0.49              | -1.15              | -0.33           | 0.99            | -0.44           | -0.98           |
| S04    | Pooh     | Inner  | Summer | Warm | -1.67              | 0.98               | -0.98           | 1.27            | -1.56           | 0.66            |
| S05    | Pooh     | Outer  | Summer | Warm | -1.71              | 0.97               | -0.71           | 0.24            | -1.69           | 0.60            |
| S06    | Pooh     | Inner  | Spring | Cool | -0.25              | -0.64              | 0.59            | -0.20           | -0.13           | -0.79           |
| S07    | Pooh     | Inner  | Spring | Cool | -1.77              | -0.36              | -1.23           | 0.77            | -1.89           | -0.61           |
| S08    | Pooh     | Inner  | Spring | Cool | -1.30              | 0.22               | -0.17           | 1.37            | -1.12           | 0.00            |
| S09    | Pooh     | Inner  | Winter | Cool | -0.07              | -1.27              | -0.65           | 0.64            | -0.22           | -1.24           |
| C34    | Plankton | Outer  | Winter | Cool | 0.65               | -0.84              | -1.22           | -1.00           | 0.50            | -0.52           |
| C35    | Plankton | Outer  | Autumn | Warm | 0.60               | 0.93               | 0.18            | -0.84           | 0.67            | 0.80            |
| C36    | Plankton | Outer  | Winter | Cool | 0.29               | -1.60              | -1.24           | -1.31           | 0.06            | -1.62           |
| C37    | Plankton | Inner  | Winter | Cool | 0.26               | -1.07              | -0.89           | 0.85            | -0.01           | -1.08           |
| C38    | Plankton | Inner  | Autumn | Warm | 0.50               | 1.63               | 0.50            | 0.70            | 0.43            | 1.15            |
| C39    | Plankton | Inner  | Winter | Cool | 0.31               | -1.00              | -1.08           | 0.76            | 0.05            | -1.01           |
| C40    | Plankton | Firth  | Winter | Cool | 0.76               | -0.35              | 2.46            | -1.51           | 0.85            | -0.42           |
| C41    | Plankton | Inner  | Winter | Cool | 0.85               | -0.51              | 1.16            | 0.38            | 0.95            | -0.30           |
| C42    | Plankton | Outer  | Winter | Cool | 0.72               | -0.62              | 0.81            | -1.06           | 0.79            | -0.59           |
| C43    | Plankton | Inner  | Summer | Warm | 0.74               | 1.24               | 1.10            | 0.57            | 0.70            | 1.68            |
| C44    | Plankton | Inner  | Spring | Cool | 0.80               | -0.14              | 1.12            | -0.12           | 0.90            | 0.24            |
| C45    | Plankton | Inner  | Summer | Warm | 0.67               | 1.27               | 0.86            | 0.93            | 0.60            | 1.50            |
| C46    | Plankton | Inner  | Autumn | Warm | 0.42               | 1.73               | 1.25            | 1.14            | 0.56            | 1.71            |

|     |          |       |        |      |       |       |       |       |       |       |
|-----|----------|-------|--------|------|-------|-------|-------|-------|-------|-------|
| C47 | Plankton | Outer | Summer | Warm | 0.26  | -0.59 | -1.64 | -1.11 | 0.17  | -1.00 |
| C48 | Plankton | Outer | Spring | Cool | 0.20  | -1.25 | -1.50 | -1.29 | 0.04  | -1.15 |
| C49 | Plankton | Outer | Summer | Warm | -1.31 | 1.10  | -0.56 | -0.55 | -1.47 | 0.81  |
| C50 | Plankton | Outer | Spring | Cool | 0.89  | -0.53 | 0.42  | -1.95 | 1.16  | -0.54 |
| C51 | Plankton | Outer | Autumn | Warm | 0.21  | -0.64 | -1.24 | 0.56  | 0.03  | -0.83 |
| C52 | Plankton | Firth | Spring | Cool | 0.72  | -0.36 | 2.02  | -1.44 | 0.91  | -0.55 |
| C53 | Plankton | Inner | Spring | Cool | 0.62  | -1.52 | -0.28 | 0.57  | 0.64  | -1.42 |
| C54 | Plankton | Outer | Spring | Cool | 0.54  | -1.18 | -1.01 | -1.36 | 0.54  | -1.21 |
| C55 | Plankton | Firth | Autumn | Warm | 0.71  | 0.98  | 2.09  | -0.10 | 0.74  | 1.16  |
| C56 | Plankton | Inner | Autumn | Warm | 0.87  | 1.11  | 1.14  | 0.63  | 0.93  | 1.30  |
| C57 | Plankton | Outer | Autumn | Warm | 0.75  | 0.05  | -0.27 | -0.69 | 0.61  | 0.10  |

| Bray -<br>CAP1R | Bray -<br>CAP2R | UUF -<br>CAP1Type | UUF -<br>CAP1Temp | UUF -<br>CAP1R | UUF -<br>CAP2R |
|-----------------|-----------------|-------------------|-------------------|----------------|----------------|
| 0.46            | 0.75            | -0.22             | 0.84              | 0.56           | -0.24          |
| -0.33           | 0.70            | -1.75             | 0.11              | -0.04          | 0.84           |
| -0.50           | 0.83            | 0.02              | 0.82              | -0.82          | 0.49           |
| -0.30           | 2.18            | -1.61             | 0.44              | -0.03          | 1.40           |
| -0.36           | 0.47            | -0.42             | -0.65             | 0.35           | 1.01           |
| -1.25           | 0.66            | -1.26             | 1.17              | -0.55          | 1.39           |
| -0.57           | 0.43            | -1.39             | 0.06              | -0.14          | 0.39           |
| 0.75            | -0.21           | -0.15             | -1.07             | 0.56           | -1.28          |
| -2.01           | -0.12           | -1.98             | -1.12             | -1.37          | -0.04          |
| -0.03           | 1.20            | -1.03             | 0.52              | 0.34           | 1.15           |
| -0.92           | 0.02            | -0.06             | -1.01             | -0.31          | 0.24           |
| -1.24           | -1.19           | 0.67              | -0.61             | -1.10          | -1.15          |

|       |       |       |       |       |       |
|-------|-------|-------|-------|-------|-------|
| 0.38  | -1.20 | 0.57  | 0.49  | -0.02 | -0.02 |
| -1.61 | -1.29 | 0.09  | -1.08 | -1.57 | -1.60 |
| -1.03 | 0.45  | 0.09  | -0.23 | -0.07 | 1.46  |
| 0.81  | 0.89  | 0.59  | 1.23  | 0.67  | 0.64  |
| -1.21 | 0.43  | 0.07  | -0.13 | -0.11 | 1.29  |
| 2.47  | -1.50 | 0.86  | -1.37 | 1.53  | -2.87 |
| 1.14  | 0.03  | 0.54  | -0.99 | 0.85  | -0.28 |
| 1.24  | -1.31 | 0.72  | -0.26 | 1.03  | -0.39 |
| 1.05  | 1.60  | 0.92  | 0.94  | 0.55  | -0.15 |
| 1.34  | 0.22  | 0.28  | 0.14  | 0.76  | 0.53  |
| 0.71  | 1.54  | 0.59  | 1.19  | 0.47  | 0.90  |
| 1.42  | 1.54  | 0.12  | 1.25  | 0.97  | 0.56  |
| -1.71 | -0.61 | 0.03  | -0.14 | -2.00 | -0.91 |
| -1.57 | -1.26 | -0.16 | -0.85 | -1.62 | -0.42 |
| -0.57 | -0.63 | -0.61 | -0.18 | -0.76 | -2.29 |
| 1.04  | -2.50 | 1.09  | -1.30 | -0.34 | -1.77 |
| -1.47 | 0.05  | -0.16 | 0.52  | -0.72 | 1.56  |
| 2.02  | -1.43 | 0.37  | -0.09 | 1.63  | -1.27 |
| -0.46 | -0.40 | 0.41  | -1.57 | 0.33  | 0.30  |
| -0.87 | -1.59 | 0.69  | 0.20  | -1.25 | -0.56 |
| 1.92  | 0.51  | 0.41  | 0.54  | 1.59  | 0.59  |
| 1.35  | 0.90  | 0.85  | 1.36  | 0.77  | 0.45  |
| -0.09 | -0.14 | 0.81  | 0.81  | -0.14 | 0.02  |

CAP analysis results for COI DNA barcode

| Sample | Type | Region | Season | Temp | Jaccard -<br>CAP1Type | Jaccard -<br>CAP1Temp | Jaccard -<br>CAP1R | Jaccard -<br>CAP2R | Bray -<br>CAP1Type | Bray -<br>CAP1Temp |
|--------|------|--------|--------|------|-----------------------|-----------------------|--------------------|--------------------|--------------------|--------------------|
|--------|------|--------|--------|------|-----------------------|-----------------------|--------------------|--------------------|--------------------|--------------------|

|     |          |       |        |      |       |       |       |       |       |       |
|-----|----------|-------|--------|------|-------|-------|-------|-------|-------|-------|
| P03 | Pooh     | Inner | Winter | Cool | -0.96 | -0.97 | -0.08 | -1.16 | -0.89 | -0.90 |
| P04 | Pooh     | Inner | Summer | Warm | -0.43 | 0.36  | -0.57 | 0.04  | -0.31 | 0.00  |
| P05 | Pooh     | Outer | Summer | Warm | -2.18 | -0.72 | 1.16  | 0.19  | -2.22 | -0.75 |
| P06 | Pooh     | Inner | Spring | Cool | -0.24 | -0.86 | -0.14 | -0.97 | -0.21 | -0.87 |
| P07 | Pooh     | Inner | Spring | Cool | -1.36 | -1.09 | 1.35  | -1.08 | -1.46 | -1.02 |
| P08 | Pooh     | Inner | Spring | Cool | -1.00 | -0.87 | -0.17 | -0.68 | -0.87 | -0.96 |
| P09 | Pooh     | Inner | Winter | Cool | -0.39 | -0.68 | 0.44  | -1.40 | -0.31 | -0.66 |
| P10 | Pooh     | Outer | Spring | Cool | -2.02 | -0.68 | 1.05  | 0.26  | -2.15 | -0.67 |
| P11 | Pooh     | Outer | Spring | Cool | -0.99 | -0.81 | 1.07  | 0.33  | -0.92 | -0.79 |
| P12 | Pooh     | Outer | Spring | Cool | -1.39 | -0.92 | 1.75  | 0.50  | -1.35 | -0.83 |
| P13 | Pooh     | Outer | Summer | Warm | -0.32 | 0.03  | 1.11  | -0.28 | -0.30 | -0.13 |
| P14 | Pooh     | Outer | Spring | Cool | 0.04  | 0.26  | -0.39 | 0.27  | 0.21  | 0.36  |
| P15 | Pooh     | Outer | Spring | Cool | -1.93 | -0.98 | 1.29  | 0.31  | -1.96 | -0.94 |
| P16 | Pooh     | Inner | Spring | Cool | -0.75 | -0.15 | -0.34 | -1.09 | -0.77 | -0.03 |
| C34 | Plankton | Outer | Winter | Cool | 0.12  | -0.45 | 1.06  | 0.14  | 0.01  | -0.44 |
| C35 | Plankton | Outer | Autumn | Warm | 0.49  | 0.11  | 0.54  | 1.37  | 0.46  | -0.14 |
| C36 | Plankton | Outer | Winter | Cool | 0.12  | -0.49 | 1.24  | -0.17 | 0.01  | -0.52 |
| C37 | Plankton | Inner | Winter | Cool | -0.07 | -0.89 | 0.21  | -1.11 | -0.17 | -0.78 |
| C38 | Plankton | Inner | Autumn | Warm | 1.17  | 1.33  | -1.61 | -0.70 | 1.23  | 1.33  |
| C39 | Plankton | Inner | Winter | Cool | 0.00  | -0.75 | 0.16  | -0.94 | -0.13 | -0.73 |
| C40 | Plankton | Firth | Winter | Cool | 0.58  | -0.28 | -1.46 | 2.72  | 0.51  | -0.37 |
| C41 | Plankton | Inner | Winter | Cool | 0.71  | -0.16 | -1.16 | -0.51 | 0.69  | -0.17 |
| C42 | Plankton | Outer | Winter | Cool | 0.42  | -0.13 | -0.40 | 0.31  | 0.45  | -0.07 |
| C43 | Plankton | Inner | Summer | Warm | 1.04  | 2.42  | -1.12 | -1.03 | 1.14  | 2.61  |
| C44 | Plankton | Inner | Spring | Cool | 0.49  | -0.23 | -0.33 | 0.32  | 0.44  | -0.34 |
| C45 | Plankton | Inner | Summer | Warm | 1.11  | 2.13  | -1.27 | -0.59 | 1.23  | 2.28  |



|     |          |       |        |      |       |       |       |       |       |       |
|-----|----------|-------|--------|------|-------|-------|-------|-------|-------|-------|
| C46 | Plankton | Inner | Autumn | Warm | 1.41  | 2.02  | -1.54 | 0.14  | 1.49  | 2.04  |
| C47 | Plankton | Outer | Summer | Warm | 0.18  | -0.08 | 1.20  | 1.08  | 0.09  | -0.22 |
| C48 | Plankton | Outer | Spring | Cool | -0.12 | -0.62 | 1.25  | 0.99  | -0.20 | -0.56 |
| C50 | Plankton | Outer | Spring | Cool | 0.42  | -0.51 | 0.22  | 1.16  | 0.37  | -0.55 |
| C51 | Plankton | Outer | Autumn | Warm | 0.34  | 0.06  | 1.01  | -0.01 | 0.25  | -0.01 |
| C52 | Plankton | Firth | Spring | Cool | 0.90  | 0.04  | -1.76 | 2.38  | 0.89  | -0.02 |
| C53 | Plankton | Inner | Spring | Cool | 0.63  | -0.52 | -0.50 | -0.30 | 0.64  | -0.48 |
| C54 | Plankton | Outer | Spring | Cool | 0.01  | -0.98 | 1.01  | -0.03 | -0.01 | -0.96 |
| C55 | Plankton | Firth | Autumn | Warm | 1.44  | 2.22  | -1.80 | 0.93  | 1.43  | 2.19  |
| C56 | Plankton | Inner | Autumn | Warm | 1.40  | 2.21  | -1.39 | -0.77 | 1.47  | 2.28  |
| C57 | Plankton | Outer | Autumn | Warm | 1.14  | 1.65  | -1.07 | -0.61 | 1.23  | 1.83  |

| Bray -<br>CAP1R | Bray -<br>CAP2R | UUF -<br>CAP1Type | UUF -<br>CAP1Temp | UUF -<br>CAP1R | UUF -<br>CAP2R |
|-----------------|-----------------|-------------------|-------------------|----------------|----------------|
| -0.15           | -1.15           | -0.49             | -1.00             | -0.33          | -1.07          |
| -0.59           | 1.47            | -1.01             | 0.33              | -0.15          | -1.07          |
| 1.26            | -0.19           | -1.38             | 0.23              | 1.10           | 0.31           |
| -0.10           | -1.22           | -0.58             | -0.86             | -0.32          | -1.24          |
| 1.70            | -1.33           | -1.02             | -0.94             | 0.85           | -1.57          |
| -0.31           | -0.08           | -0.49             | -0.54             | -0.15          | -1.13          |
| 0.63            | -1.93           | -1.08             | -1.01             | 0.29           | -1.25          |
| 1.17            | -0.13           | -1.43             | -0.56             | 0.90           | 0.21           |
| 1.06            | 0.95            | -0.84             | -0.50             | 1.15           | 0.32           |
| 1.98            | 0.43            | -1.12             | -0.44             | 1.61           | 0.47           |
| 1.21            | -1.15           | -0.49             | 0.45              | 1.28           | 0.53           |
| -0.68           | 0.33            | -0.97             | -0.45             | 0.20           | -0.18          |

|       |       |       |       |       |       |
|-------|-------|-------|-------|-------|-------|
| 1.39  | 0.22  | -1.27 | -0.88 | 1.03  | -0.49 |
| -0.32 | -1.46 | -1.28 | -0.61 | -0.05 | -1.08 |
| 1.09  | -0.31 | -0.04 | -0.33 | 1.30  | 0.76  |
| 0.43  | 2.50  | 0.42  | 0.60  | 0.39  | 1.14  |
| 1.31  | -1.05 | 0.16  | -0.53 | 1.21  | 0.07  |
| 0.30  | -0.87 | 0.17  | -0.91 | -0.15 | -1.10 |
| -1.80 | -0.94 | 0.85  | 0.89  | -1.10 | -0.40 |
| 0.24  | -0.60 | 0.37  | -0.27 | -0.07 | -0.84 |
| -1.36 | 3.05  | 0.71  | 0.49  | -1.37 | 1.52  |
| -1.19 | -0.65 | 0.78  | -0.67 | -0.93 | -0.01 |
| -0.61 | 0.49  | 0.42  | -0.80 | -0.45 | 0.09  |
| -1.21 | -1.51 | 0.54  | 1.71  | -1.06 | -0.65 |
| -0.26 | 0.74  | 0.52  | 0.46  | -0.63 | -0.43 |
| -1.34 | -0.93 | 0.58  | 1.31  | -0.45 | -0.46 |
| -1.59 | 0.16  | 1.14  | 1.59  | -0.85 | 0.34  |
| 1.32  | 1.67  | 0.27  | 0.76  | 0.95  | 0.84  |
| 1.27  | 2.00  | 0.29  | -0.38 | 0.90  | 0.79  |
| -0.04 | 2.02  | 0.59  | -0.82 | 0.24  | 1.38  |
| 0.92  | -0.67 | 0.62  | 1.08  | 0.53  | 0.44  |
| -1.74 | 2.45  | 0.92  | -0.34 | -1.69 | 2.07  |
| -0.48 | -0.03 | 0.82  | -0.39 | -0.88 | 0.46  |
| 0.99  | 0.12  | 0.43  | -0.98 | 0.57  | 0.22  |
| -1.71 | 0.39  | 1.19  | 1.51  | -2.18 | 1.88  |
| -1.46 | -1.06 | 0.87  | 1.83  | -1.01 | -0.44 |
| -1.33 | -1.73 | 0.84  | 0.96  | -0.69 | -0.44 |

## **Supplementary Material 3: Matched water sample collection supplementary material**

### **Introduction**

We collected matched water control samples alongside the scat samples to check that the dominant taxa in the scat samples are attributable to the whale scat and not environmental or laboratory contamination.

### **Collection**

Matched water samples were collected, using the same method, from water adjacent to the whale scat immediately after sample collection.

### **Characterising composition of matched water control samples**

This was done in the same way as described for the plankton and whale scat samples in the main manuscript.

### **Investigating the impact of environmental contamination on whale scat samples**

To determine environmental contamination on the scat samples we used the dataset of matched water samples collected concurrently to a subset of the scat samples. For these paired samples, we first identified the OTUs at high abundance (arbitrary >1% or >5%) in the matched water as potential environmental contaminants in the scat sample. These OTUs were removed from the scat samples to check potential environmental contamination, giving a new sample type – ‘control’ whale scat sample. We constructed PCO graphs to visualise the clustering of scat and matched water samples and then control scat and matched water samples.

If the control scat sample differs significantly from its paired matched water where the standard scat samples are not, this suggests that environmental contamination is a factor in the composition of the scat samples. Alternatively, similarity could exist because matched water samples were taken predominantly in areas where whales were foraging. Therefore, the matched water sample could reflect the taxa in a potential prey patch. To test this hypothesis, we constructed similarity matrices as described above, for both composition and relative abundance of taxa, for both the COI and 18S DNA barcodes. We then repeated the PERMANOVA with sample type, region and season as fixed factors for all matched water and scat samples (raw and rarefied data), then paired matched water and control whale scat samples (raw and rarefied data). Due to the multiple comparisons, we applied the Bonferroni correction to the results within each DNA barcode ( $\alpha = 0.05$ ;  $\alpha/8 = 0.006$ ).

## **RESULTS**

### **Characterising composition of matched water samples**

All matched water samples produced reads for either COI and/or 18S DNA barcodes (STable 3-1), although two matched water samples (M22 and M23) in the 18S DNA barcode were excluded from rarefaction-based analyses due to low number of reads. Chordata and Arthropoda were the most common Phyla observed across matched water samples and DNA barcodes (SFig. 3-1). We restricted our analyses to the 1,101 COI DNA barcode OTUs and the 267 18S DNA barcode OTUs identified to Class.

### **No evidence for substantial environmental contamination of whale scat samples**

Principal coordinate analyses showed that the scat samples did not cluster distinctly from the matched water controls for the COI and 18S DNA barcodes (Figs S3-2 and S3-3). Multi-factorial PERMANOVAs, incorporating season and region, showed sample type was not a significant factor for any dataset analysed (Table S3-2).

To examine whether this lack of differentiation was due to potential environmental contaminants in the scat, we removed OTUs abundant in the matched water samples from the paired scat samples to construct 'control' whale scat samples. Results were similar when excluded OTUs represented either 1% or 5% of matched water samples, therefore, we present results at the conservative 1% threshold. The control scat and matched water samples scattered throughout the PCO visualisation, with no obvious clustering by sample type (SFig 3-5 and 3-6). PERMANOVA analyses suggested that sample type was not a significant driver of differences in sample compositions, based on relative abundance, composition or phylogenetic similarity, for either the COI or 18S DNA barcodes. Results were non-significant using rarefied and full datasets, and with a limited dataset comparing the paired scat and adjacent water samples (STable 3-2).

Supplementary Table 3-1: The number of reads, Shannon (Sh- $\alpha$ ) and Simpson's (Si- $\alpha$ )  $\alpha$  diversity calculated per sample for whale scat (provided here for comparative purposes) and matched water (MW). Diversity statistics were calculated by subsampling to the lowest number of reads per sample per DNA barcode: 1956 reads for 18S, 952 reads for COI. Regions correspond to Outer Hauraki Gulf (Outer) and Inner Hauraki Gulf (Inner). Not all samples had sampling location information (marked by N/A).

| Scat sample | Region | Season | 18S reads | Sh- $\alpha$ | Si- $\alpha$ | COI reads | Sh- $\alpha$ | Si- $\alpha$ | MW sample | 18S reads | Sh- $\alpha$ | Si- $\alpha$ | COI reads | Sh- $\alpha$ | Si- $\alpha$ |
|-------------|--------|--------|-----------|--------------|--------------|-----------|--------------|--------------|-----------|-----------|--------------|--------------|-----------|--------------|--------------|
| S01         | Inner  | Cool   | -         | -            | -            | -         | -            | -            | M21       | 2         | 1            | 51           | 13092     | 62           | 36           |
| S02         | N/A    | Cool   | 137094    | 4            | 2            | 675       | -            | -            | M22       | 11        | -            | -            | 952       | 14           | 9            |
| S03         | Inner  | Cool   | 109592    | 6            | 3            | 5983      | 22           | 9            | M23       | 721       | -            | -            |           |              |              |
| S04         | Inner  | Warm   | 39640     | 5            | 3            | 11796     | 12           | 9            | M24       | 2038      | 6            | 4            | 8093      | 2            | 2            |
| S05         | Outer  | Warm   | 15258     | 3            | 2            | 18207     | 34           | 24           | M25       | 71339     | 8            | 4            |           |              |              |
| S06         | Inner  | Cool   | 11477     | 8            | 4            | 2075      | 37           | 22           | M26       | 7231      | 7            | 4            | 12210     | 57           | 35           |
| S07         | Inner  | Cool   | 76565     | 3            | 2            | 14836     | 81           | 51           | M27       | 17355     | 2            | 1            | 97630     | 14           | 6            |
| S08         | Inner  | Cool   | 92697     | 6            | 4            | 15136     | 29           | 12           | M28       | 134174    | 10           | 6            |           |              |              |
| S09         | Inner  | Cool   | 64078     | 4            | 2            | 4495      | 66           | 38           | M29       | 16561     | 3            | 2            | 17069     | 30           | 14           |
| S10         | Outer  | Cool   | -         | -            | -            | 8630      | 39           | 25           | M30       | -         | -            | -            | 30953     | 43           | 24           |
| S11         | Outer  | Cool   | -         | -            | -            | 4099      | 9            | 4            | M31       | -         | -            | -            | 42074     | 47           | 28           |
| S12         | Outer  | Cool   | -         | -            | -            | 26070     | 34           | 19           | M32       | -         | -            | -            | 43752     | 60           | 37           |
| S13         | Outer  | Warm   | -         | -            | -            | 73508     | 29           | 14           | M33       | -         | -            | -            | 2168      | 45           | 25           |
| S14         | Outer  | Cool   | 7127      | 5            | 3            | 7763      | 52           | 33           |           |           |              |              |           |              |              |
| S15         | Outer  | Cool   | 21132     | 5            | 2            | 17563     | 46           | 30           |           |           |              |              |           |              |              |
| S16         | Inner  | Cool   | 227       | -            | -            | 6235      | 14           | 10           |           |           |              |              |           |              |              |
| S17         | N/A    | Warm   | 6022      | 3            | 2            | 13606     | 25           | 14           |           |           |              |              |           |              |              |
| S18         | Inner  | Warm   | 46235     | 2            | 2            |           |              |              |           |           |              |              |           |              |              |
| S19         | Inner  | Warm   | 21677     | 11           | 8            |           |              |              |           |           |              |              |           |              |              |
| S20         | Inner  | Cool   | 513       | -            | -            |           |              |              |           |           |              |              |           |              |              |

Supplementary Table 3-2: P-value for each factor in multi-factorial PERMANOVA used to investigate the impact of environmental contamination on the whale scat samples. For each analysis, the table shows the following: DNA barcode, dataset used, similarity matrix (Matrix), sample size for whale scat (scat samples), matched water control samples (MWC), control whale scat samples, and the p-value from the single-factor PERMANOVA where sample type was the factor. The dataset used was either rarefied (number of reads) or the raw data (Raw), using either all available samples (all) or only paired whale scat and matched water control samples (paired). Some samples were excluded from the rarefied dataset due to lower number of reads. These datasets were then transformed using a Jaccard similarity measure on presence-absence transformed data (Jaccard) or a Bray-Curtis similarity matrix on fourth root transformed data (Bray-Curtis), weighted (Unifrac-W) and unweighted unifrac (Unifrac-U) distances. The Bonferroni-corrected p-value is 0.006; no analyses met this criteria for factor ‘Type’.

| DNA barcode | Dataset                       | Matrix      | Scat samples | MWC samples | Control scat | Region | Season | Type  |
|-------------|-------------------------------|-------------|--------------|-------------|--------------|--------|--------|-------|
| COI         | Rarefied (952 reads) - all    | Jaccard     | 14           | 9           | -            | 0.045  | 0.290  | 0.126 |
| COI         | Rarefied (952 reads) - all    | Bray-Curtis | 14           | 9           | -            | 0.057  | 0.307  | 0.134 |
| COI         | Rarefied (952 reads) - all    | Unifrac-U   | 14           | 9           | -            | 0.011  | 0.303  | 0.220 |
| COI         | Rarefied (952 reads) - all    | Unifrac-W   | 14           | 9           | -            | 0.186  | 0.160  | 0.266 |
| COI         | Raw – all                     | Jaccard     | 14           | 9           | -            | 0.071  | 0.227  | 0.061 |
| COI         | Raw – all                     | Bray-Curtis | 14           | 9           | -            | 0.071  | 0.280  | 0.102 |
| COI         | Raw – all                     | Unifrac-U   | 14           | 9           | -            | 0.001  | 0.200  | 0.149 |
| COI         | Raw – all                     | Unifrac-W   | 14           | 9           | -            | 0.200  | 0.289  | 0.216 |
| COI         | Rarefied (952 reads) – paired | Jaccard     | -            | 8           | 8            | 0.279  | 0.213  | 0.555 |
| COI         | Rarefied (952 reads) – paired | Bray-Curtis | -            | 8           | 8            | 0.110  | 0.063  | 0.203 |
| COI         | Rarefied (952 reads) – paired | Unifrac-U   | -            | 8           | 8            | 0.015  | 0.068  | 0.593 |
| COI         | Rarefied (952 reads) - paired | Unifrac-W   | -            | 8           | 8            | 0.280  | 0.213  | 0.555 |
| COI         | Raw – paired                  | Jaccard     | -            | 8           | 8            | 0.084  | 0.049  | 0.115 |
| COI         | Raw – paired                  | Bray-Curtis | -            | 8           | 8            | 0.081  | 0.049  | 0.134 |
| COI         | Raw – paired                  | Unifrac-U   | -            | 8           | 8            | 0.239  | 0.224  | 0.550 |
| COI         | Raw – paired                  | Unifrac-W   | -            | 8           | 8            | 0.014  | 0.162  | 0.014 |
| 18S         | Rarefied (1956) - all         | Jaccard     | 11           | 7           | -            | 0.212  | 0.264  | 0.724 |

|     |                         |             |    |   |   |       |       |       |
|-----|-------------------------|-------------|----|---|---|-------|-------|-------|
| 18S | Rarefied (1956) - all   | Bray-Curtis | 11 | 7 | - | 0.217 | 0.389 | 0.502 |
| 18S | Rarefied (1956) - all   | Unifrac-U   | 11 | 7 | - | 0.596 | 0.169 | 0.946 |
| 18S | Rarefied (1956) - all   | Unifrac-W   | 11 | 7 | - | 0.903 | 0.452 | 0.560 |
| 18S | Raw – all               | Jaccard     | 13 | 8 | - | 0.495 | 0.521 | 0.179 |
| 18S | Raw – all               | Bray-Curtis | 13 | 8 | - | 0.374 | 0.563 | 0.285 |
| 18S | Raw – all               | Unifrac-U   | 13 | 8 | - | 0.684 | 0.365 | 0.363 |
| 18S | Raw – all               | Unifrac-W   | 13 | 8 | - | 0.884 | 0.303 | 0.355 |
| 18S | Rarefied (1956) -paired | Jaccard     | -  | 7 | 7 | 0.723 | 0.853 | 0.049 |
| 18S | Rarefied (1956) -paired | Bray-Curtis | -  | 7 | 7 | 0.831 | 0.900 | 0.032 |
| 18S | Rarefied (1956) -paired | Unifrac-U   | -  | 7 | 7 | 0.771 | 0.427 | 0.175 |
| 18S | Rarefied (1956) -paired | Unifrac-W   | -  | 7 | 7 | 0.739 | 0.888 | 0.046 |
| 18S | Raw – paired            | Jaccard     | -  | 7 | 7 | 0.497 | 0.868 | 0.039 |
| 18S | Raw – paired            | Bray-Curtis | -  | 7 | 7 | 0.651 | 0.850 | 0.025 |
| 18S | Raw – paired            | Unifrac-U   | -  | 7 | 7 | 0.862 | 0.646 | 0.104 |
| 18S | Raw – paired            | Unifrac-W   | -  | 7 | 7 | 0.730 | 0.863 | 0.019 |

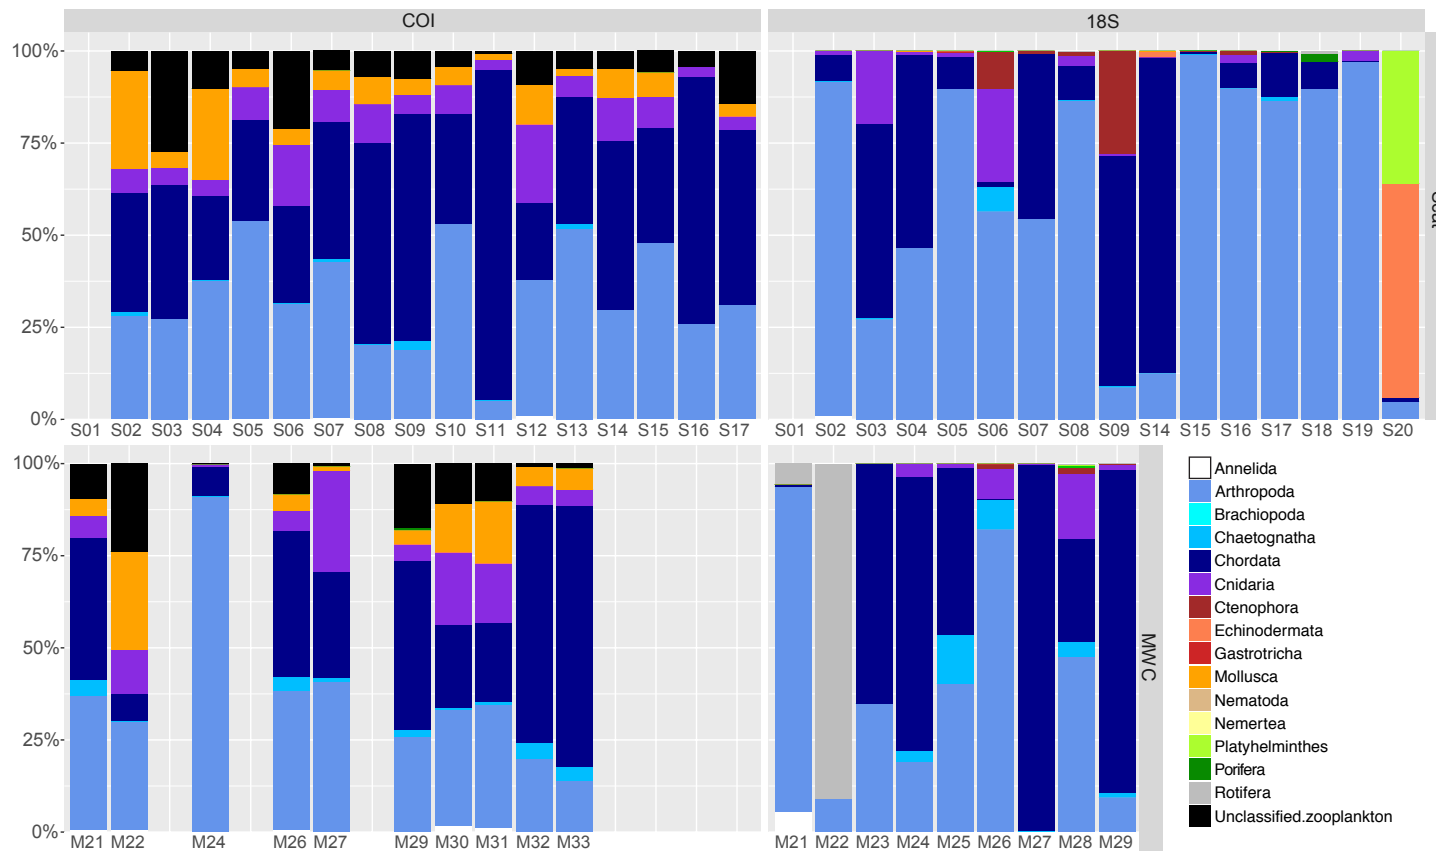

Figure 3-1: Summary of reads by taxa for whale scat and matched water samples stratified by sample type and DNA barcodes. Sample name at bottom of bars reflects sample type (MW – M, and whale scat – S). The matched water sample for a given whale scat sample is directly below the whale scat sample e.g. 29 is the matched water for P09. Whale scat samples S14-S17 did not have matched waters and not all samples were successfully sequenced



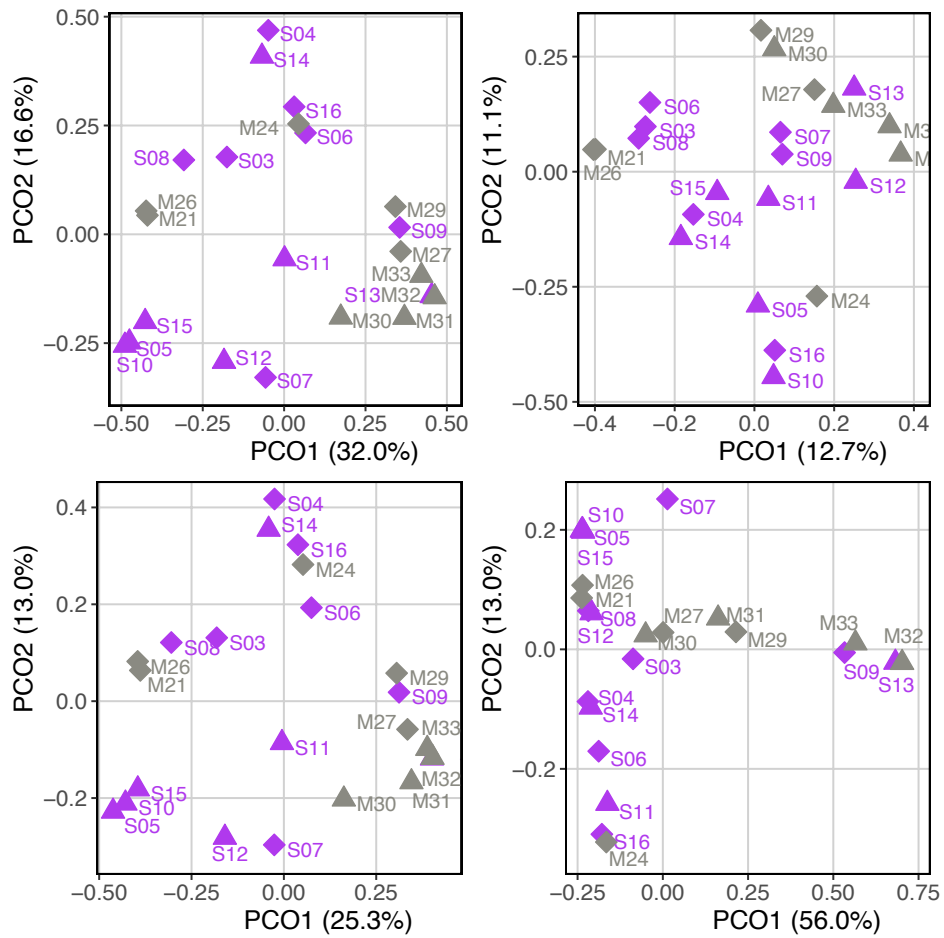

Figure 3-2 Clustering of whale scat (purple) and matched water samples (grey) based on principal coordinate analysis (PCO) of the COI DNA barcode. PCO is based on different distance matrices, from the top left: Bray-Curtis distance matrix based on fourth root transformed data unweighted and weighted UniFrac distance matrices and Jaccard distance matrix based on presence/absence transformed data. Region is reflected by the shape, with diamond represent Inner Gulf samples and triangles representing Outer Gulf samples. Data were rarefied to 952 reads per sample.

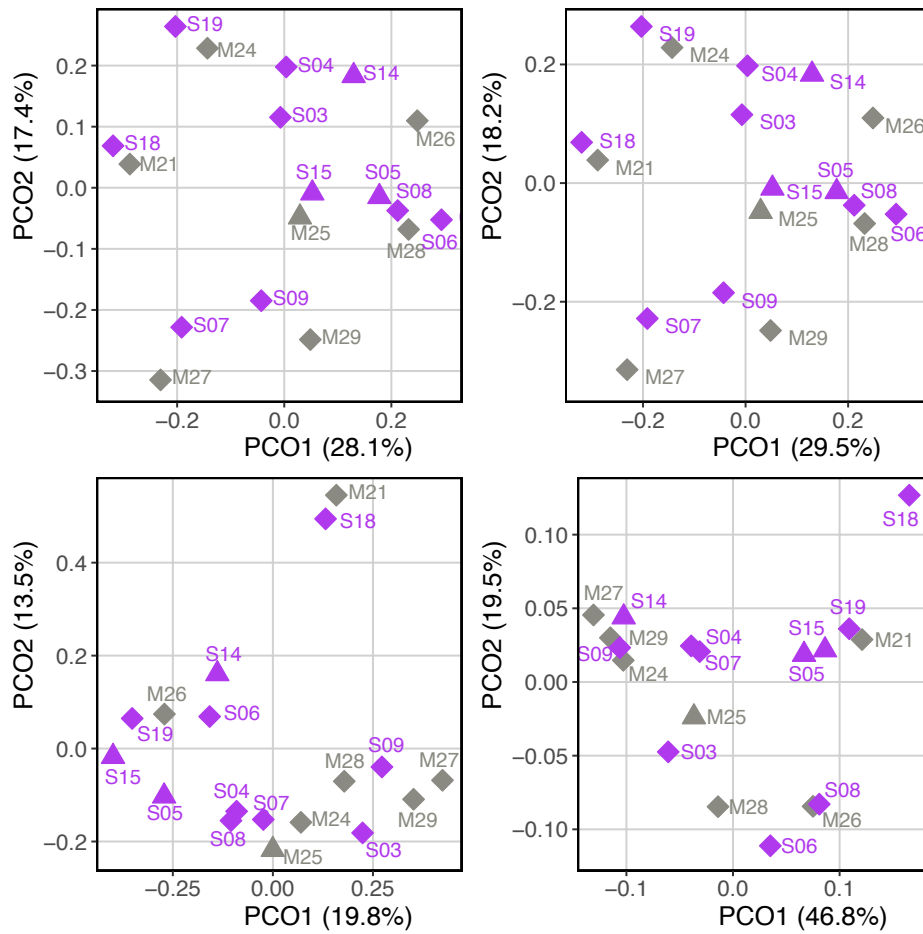

Supplementary Figure 3-3: Clustering of whale scat (purple) and matched water samples (grey) based on principal coordinate analysis (PCO) of the 18S DNA barcode. PCO is based on different distance matrices, from the top left: Bray-Curtis distance matrix based on fourth root transformed data, unweighted and weighted UniFrac distance matrices and Jaccard distance matrix based on presence/absence transformed data. Region is reflected by the shape, with diamond represent Inner Gulf samples and triangles representing Outer Gulf samples. Data were rarefied to 1956 reads per sample.

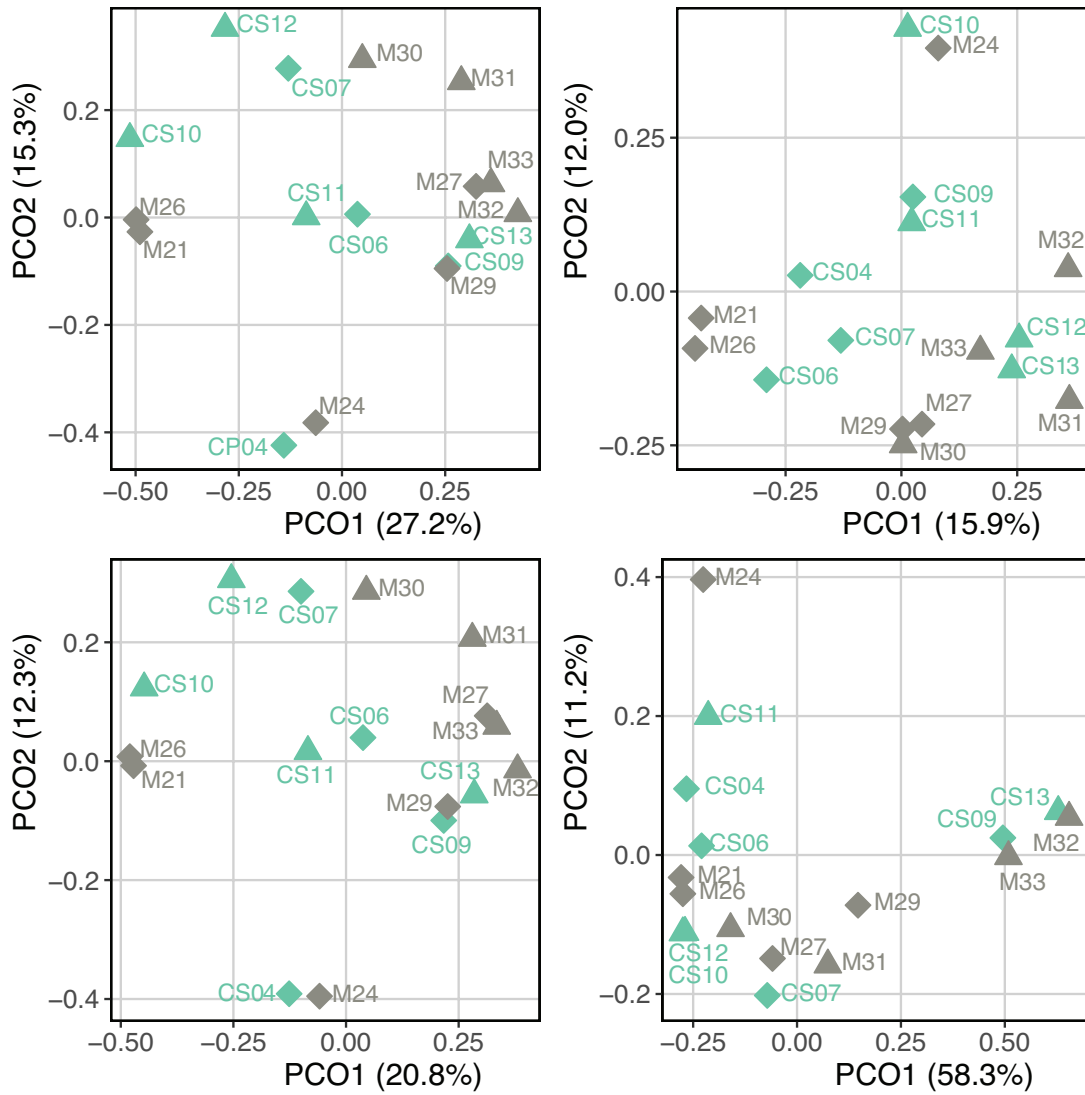

SFig 3-4: Clustering of control whale scat (aquamarine) and matched water samples (grey) based on principal coordinate analysis (PCO) of the COI DNA barcode. PCO is based on different distance matrices, from the top left: Bray-Curtis distance matrix based on fourth root transformed data, unweighted and weighted UniFrac distance matrices and Jaccard distance matrix based on presence/absence transformed data. Region is reflected by the shape, with diamond represent Inner Gulf samples and triangles representing Outer Gulf samples. Data were rarefied to 952 reads per sample.

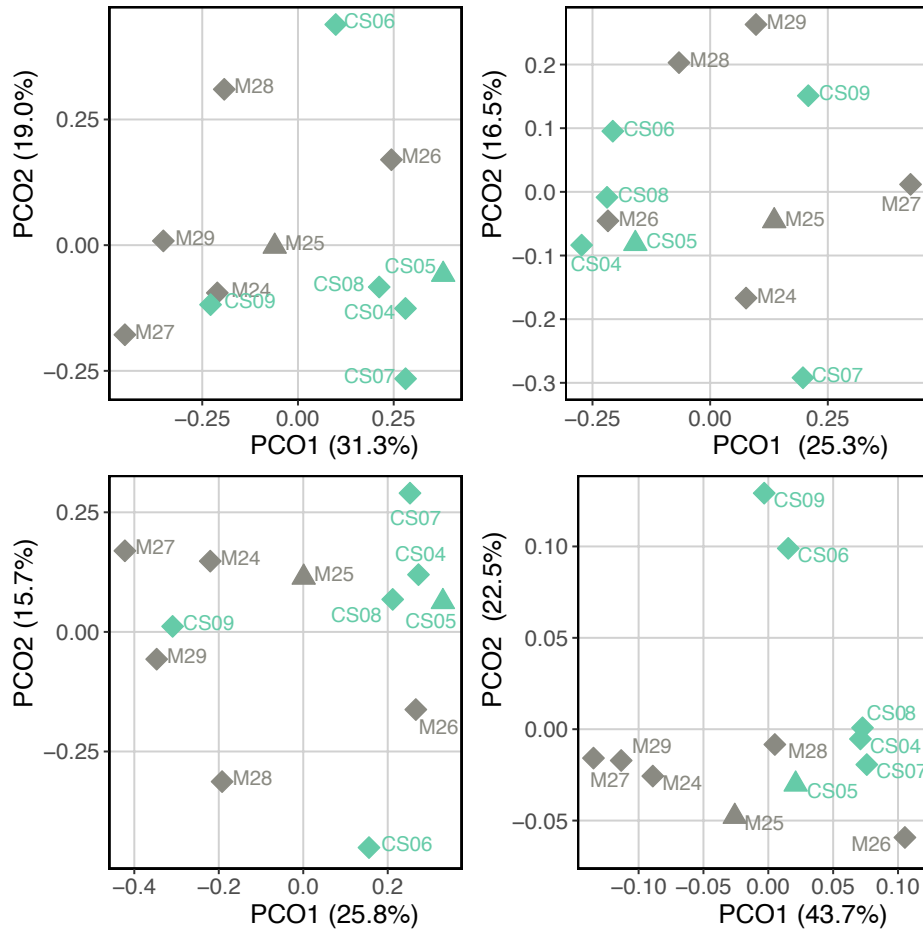

SFig 3-5: Clustering of control whale scat (aquamarine) and matched water samples (grey) based on principal coordinate analysis (PCO) of the 18S DNA barcode. PCO is based on different distance matrices, from the top left: Bray-Curtis distance matrix based on fourth root transformed data, unweighted and weighted UniFrac distance matrices and Jaccard distance matrix based on presence/absence transformed data. Region is reflected by the shape, with diamond represent Inner Gulf samples and triangles representing Outer Gulf samples. Data were rarefied to 1956 reads per sample.
